# Supplementary material for: B-site ordered double perovskite LaBa1−xSrxZnSbO6 (0 ≤ x ≤ 1): Sr2+-doping-induced symmetry evolution and structure–luminescence correlations
Source: Royal Society of Chemistry journal article supplement (doi:10.1039/c5dt04150c), 2016-01-01
Supplement: c5dt04150c1.pdf [file c5dt04150c1.pdf]

Electronic Supplementary Information for

B-site ordered double perovskite  $\text{LaBa}_{1-x}\text{Sr}_x\text{ZnSbO}_6$  ( $0 \leq x \leq 1$ ):  
 $\text{Sr}^{2+}$ -doping-induced symmetry evolution and structure-  
luminescence correlations

*Pengfei Jiang, Zhengyang Zhou, Wenliang Gao, Rihong Cong, \* Tao Yang \**

College of Chemistry and Chemical Engineering, Chongqing University, Chongqing  
400044, P. R. China

\*Correspondence authors, Email: [congrihong@cqu.edu.cn](mailto:congrihong@cqu.edu.cn); [taoyang@cqu.edu.cn](mailto:taoyang@cqu.edu.cn); Tel:  
(8623)65105065, Fax: (8623)65105065.

Table S1 Lattice parameters of Eu<sup>3+</sup> doped samples obtained by Le-Bail fitting.

| Formula                                                                                      | <i>a</i> (Å) | <i>b</i> (Å) | <i>c</i> (Å) | <i>V</i> (Å <sup>3</sup> ) | <i>β</i> (°) |
|----------------------------------------------------------------------------------------------|--------------|--------------|--------------|----------------------------|--------------|
| La <sub>0.95</sub> Eu <sub>0.05</sub> BaZnSbO <sub>6</sub>                                   | 5.7093       | 5.7092       | 8.0735       | 263.16                     | 89.893       |
| La <sub>0.95</sub> Eu <sub>0.05</sub> Ba <sub>0.8</sub> Sr <sub>0.2</sub> ZnSbO <sub>6</sub> | 5.6977       | 5.6943       | 8.0576       | 261.42                     | 90.138       |
| La <sub>0.95</sub> Eu <sub>0.05</sub> Ba <sub>0.6</sub> Sr <sub>0.4</sub> ZnSbO <sub>6</sub> | 5.6908       | 5.6850       | 8.0632       | 260.86                     | 90.219       |
| La <sub>0.95</sub> Eu <sub>0.05</sub> Ba <sub>0.4</sub> Sr <sub>0.6</sub> ZnSbO <sub>6</sub> | 5.6798       | 5.6740       | 8.0276       | 258.71                     | 90.011       |
| La <sub>0.95</sub> Eu <sub>0.05</sub> Ba <sub>0.2</sub> Sr <sub>0.8</sub> ZnSbO <sub>6</sub> | 5.6739       | 5.6702       | 8.0219       | 258.08                     | 90.040       |
| La <sub>0.975</sub> Eu <sub>0.025</sub> SrZnSbO <sub>6</sub>                                 | 5.6564       | 5.6567       | 7.9991       | 255.94                     | 89.976       |
| La <sub>0.95</sub> Eu <sub>0.05</sub> SrZnSbO <sub>6</sub>                                   | 5.6566       | 5.6569       | 7.9977       | 255.92                     | 89.995       |
| La <sub>0.92</sub> Eu <sub>0.08</sub> SrZnSbO <sub>6</sub>                                   | 5.6537       | 5.6552       | 7.9941       | 255.59                     | 90.006       |

Table S2 Atomic coordinates, isotropic thermal displacement factors and site occupancies for LaBa<sub>1-x</sub>Sr<sub>x</sub>ZnSbO<sub>6</sub> (*x* = 0.2, 0.4, 0.6, 0.8).

| LaBa <sub>0.8</sub> Sr <sub>0.2</sub> ZnSbO <sub>6</sub> | <i>x</i> | <i>y</i> | <i>z</i>  | Occupancy   | <i>B</i> <sub>eq</sub> (Å <sup>2</sup> ) |
|----------------------------------------------------------|----------|----------|-----------|-------------|------------------------------------------|
| Ba/La/Sr                                                 | 0.499(1) | 0        | 0.2495(4) | 0.4/0.5/0.1 | 0.014(1)                                 |
| Zn                                                       | 0        | 0        | 0         | 1           | 0.014(1)                                 |
| Sb                                                       | 0        | 0        | 0.5       | 1           | 00.011(3)                                |
| O1                                                       | 0.063(2) | 0        | 0.256(3)  | 1           | 0.018(1)                                 |
| O2                                                       | 0.275(2) | 0.236(2) | 0.971(1)  | 1           | 0.018(1)                                 |
| LaBa <sub>0.6</sub> Sr <sub>0.4</sub> ZnSbO <sub>6</sub> | <i>x</i> | <i>y</i> | <i>z</i>  | Occupancy   | <i>B</i> <sub>eq</sub> (Å <sup>2</sup> ) |
| Ba/La/Sr                                                 | 0.498(1) | 0        | 0.2492(3) | 0.3/0.5/0.2 | 0.014(1)                                 |
| Zn                                                       | 0        | 0        | 0         | 1           | 0.014(1)                                 |
| Sb                                                       | 0        | 0        | 0.5       | 1           | 0.011(1)                                 |
| O1                                                       | 0.066(2) | 0        | 0.251(3)  | 1           | 0.022(1)                                 |
| O2                                                       | 0.264(3) | 0.246(2) | 0.031(1)  | 1           | 0.022(1)                                 |
| LaBa <sub>0.4</sub> Sr <sub>0.6</sub> ZnSbO <sub>6</sub> | <i>x</i> | <i>y</i> | <i>z</i>  | Occupancy   | <i>B</i> <sub>eq</sub> (Å <sup>2</sup> ) |

|                                                          |          |           |           |             |                                          |
|----------------------------------------------------------|----------|-----------|-----------|-------------|------------------------------------------|
| Ba/La/Sr                                                 | 0.001(1) | 0.5140(3) | 0.2519(7) | 0.2/0.5/0.3 | 0.009(1)                                 |
| Zn                                                       | 0        | 0         | 0         | 1           | 0.005(1)                                 |
| Sb                                                       | 0        | 0         | 0.5       | 1           | 0.003(1)                                 |
| O1                                                       | 0.081(4) | 0.991(3)  | 0.262(5)  | 1           | 0.005(3)                                 |
| O2                                                       | 0.759(6) | 0.275(5)  | 0.007(4)  | 1           | 0.005(3)                                 |
| O3                                                       | 0.277(5) | 0.231(5)  | 0.954(3)  | 1           | 0.005(3)                                 |
| <hr/>                                                    |          |           |           |             |                                          |
| LaBa <sub>0.2</sub> Sr <sub>0.8</sub> ZnSbO <sub>6</sub> | <i>x</i> | <i>y</i>  | <i>z</i>  | Occupancy   | <i>B</i> <sub>eq</sub> (Å <sup>2</sup> ) |
| Ba/La/Sr                                                 | 0.005(2) | 0.5202(2) | 0.253(1)  | 0.1/0.5/0.4 | 0.008(1)                                 |
| Zn                                                       | 0        | 0         | 0         | 1           | 0.006(1)                                 |
| Sb                                                       | 0        | 0         | 0.5       | 1           | 0.0043(9)                                |
| O1                                                       | 0.090(3) | 0.995(2)  | 0.253(4)  | 1           | 0.003(2)                                 |
| O2                                                       | 0.759(5) | 0.272(4)  | 0.005(3)  | 1           | 0.003(2)                                 |
| O3                                                       | 0.293(4) | 0.228(4)  | 0.954(3)  | 1           | 0.003(2)                                 |

Table S3 Selected interatomic distances (Å) and bond angles (°) for LaBa<sub>1-x</sub>Sr<sub>x</sub>ZnSbO<sub>6</sub> (*x* = 0.2, 0.4, 0.6, 0.8). Calculated bond valence sums (BVS) for Zn<sup>2+</sup> and Sb<sup>5+</sup> are also given.

| <b>LaBa<sub>0.8</sub>Sr<sub>0.2</sub>ZnSbO<sub>6</sub></b> |    |         |           |         |
|------------------------------------------------------------|----|---------|-----------|---------|
| La/Ba/Sr-O2                                                | ×2 | 2.61(1) | Zn-O1 ×2  | 2.11(2) |
| La/Ba/Sr -O2                                               | ×2 | 2.79(1) | Zn-O2 ×4  | 2.08(1) |
| La/Ba/Sr -O2                                               | ×2 | 2.94(1) | BVS       | 2.09    |
| La/Ba/Sr -O2                                               | ×2 | 3.10(1) | Sb-O1 ×2  | 1.98(2) |
| La/Ba/Sr -O1                                               | ×1 | 2.8(2)  | Sb-O2 ×4  | 1.99(1) |
| La/Ba/Sr -O1                                               | ×2 | 2.87(2) | BVS       | 5.33    |
| La/Ba/Sr -O1                                               | ×1 | 3.43(2) | Zn-O1- Sb | 158.9   |
|                                                            |    |         | Zn-O2- Sb | 165.3   |

**LaBa<sub>0.6</sub>Sr<sub>0.4</sub>ZnSbO<sub>6</sub>**

|                 |         |           |         |
|-----------------|---------|-----------|---------|
| La/Ba/Sr -O2 ×2 | 2.57(1) | Zn-O1 ×2  | 2.09(2) |
| La/Ba/Sr -O2 ×2 | 2.81(1) | Zn-O2 ×4  | 2.08(1) |
| La/Ba/Sr -O2 ×2 | 2.91(1) | BVS       | 2.16    |
| La/Ba/Sr -O2 ×2 | 3.12(1) | Sb-O1 ×2  | 1.99(2) |
| La/Ba/Sr -O1 ×1 | 2.49(2) | Sb-O2 ×4  | 1.99(1) |
| La/Ba/Sr -O1 ×2 | 2.86(2) | BVS       | 2.25    |
| La/Ba/Sr -O1 ×1 | 3.23(2) | Zn-O1- Sb | 159.7   |
|                 |         | Zn-O2- Sb | 163.9   |

**LaBa<sub>0.4</sub>Sr<sub>0.6</sub>ZnSbO<sub>6</sub>**

|             |         |           |         |
|-------------|---------|-----------|---------|
| La/Ba/Sr-O1 | 2.39(2) | Zn-O1 ×2  | 2.15(4) |
| La/Ba/Sr-O1 | 2.75(2) | Zn-O2 ×2  | 2.08(3) |
| La/Ba/Sr-O1 | 3.00(2) | Zn-O3 ×2  | 2.09(3) |
| La/Ba/Sr-O1 | 3.31(2) | BVS       | 2.04    |
| La/Ba/Sr-O2 | 2.75(3) | Sb-O1 ×2  | 1.97(4) |
| La/Ba/Sr-O2 | 2.76(3) | Sb-O2 ×2  | 1.95(3) |
| La/Ba/Sr-O2 | 2.85(3) | Sb-O3 ×2  | 2.02(3) |
| La/Ba/Sr-O2 | 3.01(3) | BVS       | 5.44    |
| La/Ba/Sr-O3 | 2.49(3) | Zn-O1- Sb | 154.0   |
| La/Ba/Sr-O3 | 2.71(3) | Zn-O2- Sb | 171.5   |
| La/Ba/Sr-O3 | 2.95(3) | Zn-O3- Sb | 156.8   |
| La/Ba/Sr-O3 | 3.28(3) |           |         |

**LaBa<sub>0.2</sub>Sr<sub>0.8</sub>ZnSbO<sub>6</sub>**

|             |         |          |         |
|-------------|---------|----------|---------|
| La/Ba/Sr-O1 | 2.30(2) | Zn-O1 ×2 | 2.09(3) |
| La/Ba/Sr-O1 | 2.73(2) | Zn-O2 ×2 | 2.06(3) |
| La/Ba/Sr-O1 | 3.02(2) | Zn-O3 ×2 | 2.14(2) |
| La/Ba/Sr-O2 | 2.73(3) | BVS      | 2.08    |

|             |         |           |         |
|-------------|---------|-----------|---------|
| La/Ba/Sr-O2 | 2.80(3) | Sb-O1 ×2  | 2.04(3) |
| La/Ba/Sr-O2 | 2.83(3) | Sb-O2 ×2  | 1.96(3) |
| La/Ba/Sr-O2 | 2.99(3) | Sb-O3 ×2  | 1.97(2) |
| La/Ba/Sr-O3 | 2.46(3) | BVS       | 5.28    |
| La/Ba/Sr-O3 | 2.77(3) | Zn-O1- Sb | 151.3   |
| La/Ba/Sr-O3 | 2.87(3) | Zn-O2- Sb | 172.4   |
| La/Ba/Sr-O3 | 3.34(2) | Zn-O3- Sb | 154.7   |

Table S4 Lattice parameters of  $\text{LaBa}_{1-x}\text{Sr}_x\text{ZnSbO}_6$  ( $0 \leq x \leq 1$ ) obtained by Rietveld refinement.

| Formula                                          | $a$ (Å)   | $b$ (Å)   | $c$ (Å)   | $V$ (Å <sup>3</sup> ) | $\beta$ (°) |
|--------------------------------------------------|-----------|-----------|-----------|-----------------------|-------------|
| $\text{LaBaZnSbO}_6$                             | 5.7253(2) | 5.7066(3) | 8.0689(3) | 263.63(2)             | 90.00(4)    |
| $\text{LaBa}_{0.8}\text{Sr}_{0.2}\text{ZnSbO}_6$ | 5.7247(1) | 5.6960(1) | 8.0533(2) | 262.602(9)            | 90.01(1)    |
| $\text{LaBa}_{0.6}\text{Sr}_{0.4}\text{ZnSbO}_6$ | 5.7132(1) | 5.6807(1) | 8.0318(2) | 260.67(1)             | 90.035(6)   |
| $\text{LaBa}_{0.4}\text{Sr}_{0.6}\text{ZnSbO}_6$ | 5.6945(2) | 5.6731(2) | 8.0225(3) | 259.17(2)             | 89.99(2)    |
| $\text{LaBa}_{0.2}\text{Sr}_{0.8}\text{ZnSbO}_6$ | 5.6750(2) | 5.6667(2) | 8.0126(2) | 257.67(1)             | 89.961(6)   |
| $\text{LaSrZnSbO}_6$                             | 5.6586(2) | 5.6577(2) | 7.9964(2) | 256.00(2)             | 90.00(2)    |

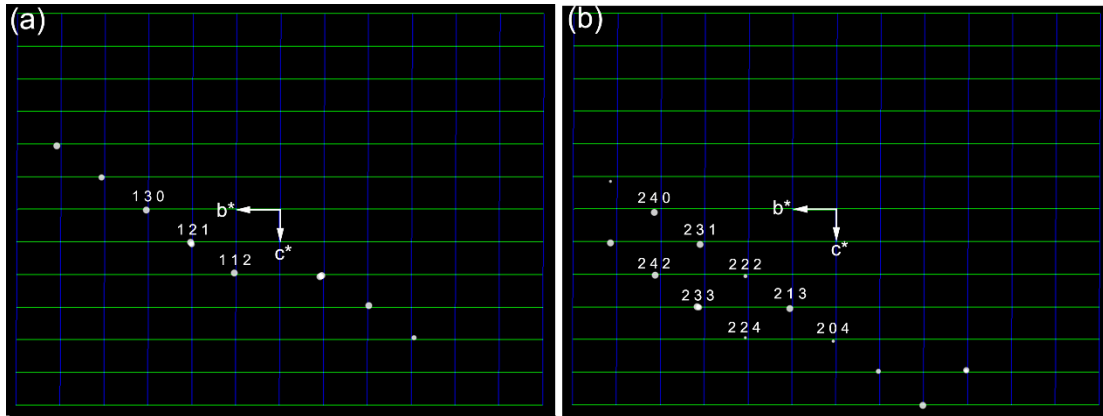

Fig. S1 Selected views in the reciprocal space corresponding to (a)  $1kl$  and (b)  $2kl$  planes for  $\text{LaBaZnSbO}_6$ . The reflection condition is consistent with  $h + k + l = 2n$ .

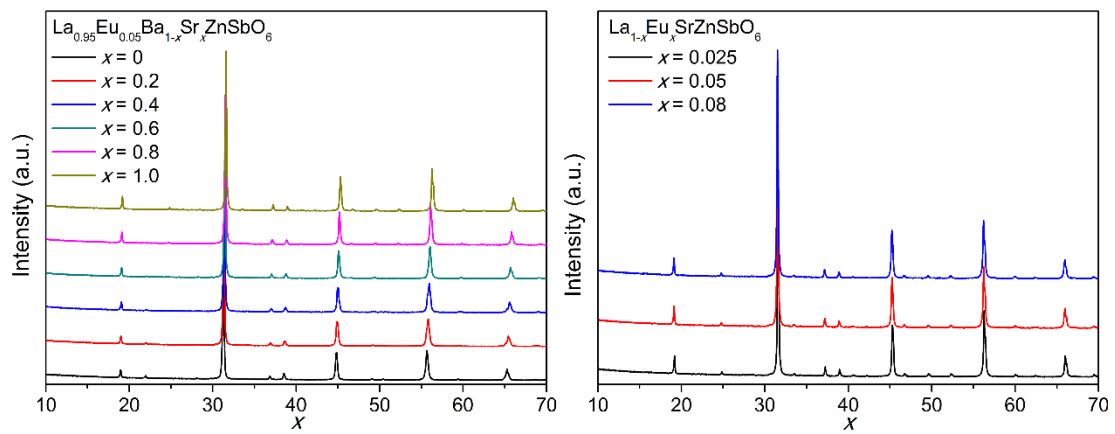

Fig. S2 XRD patterns for  $\text{La}_{0.95}\text{Eu}_{0.05}\text{Ba}_{1-x}\text{Sr}_x\text{ZnSbO}_6$  ( $0 \leq x \leq 1$ ) and  $\text{La}_{1-x}\text{Eu}_x\text{SrZnSbO}_6$  ( $x = 0.025, 0.05, 0.08$ ).

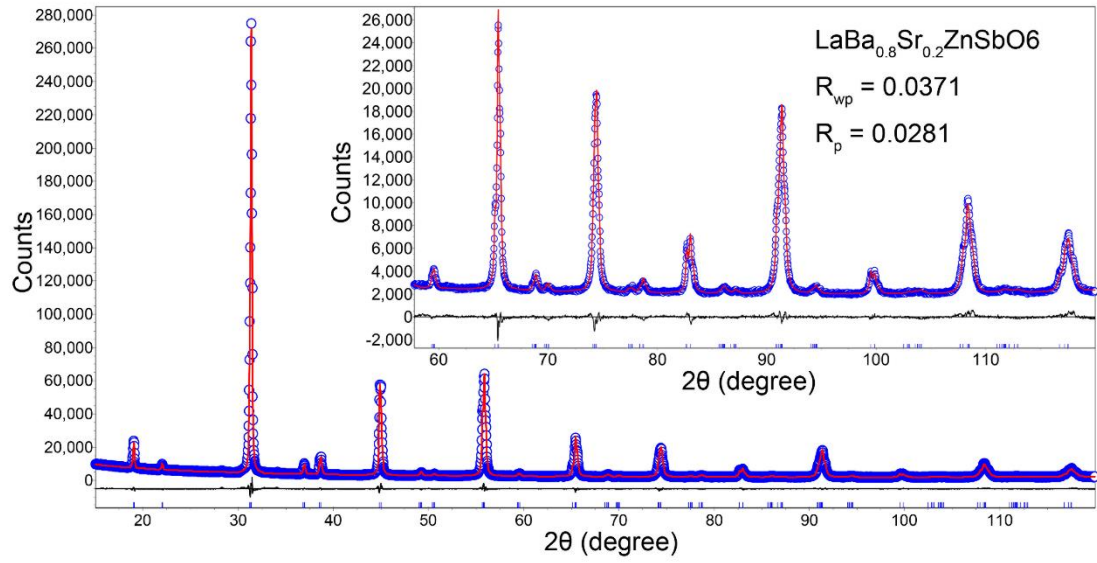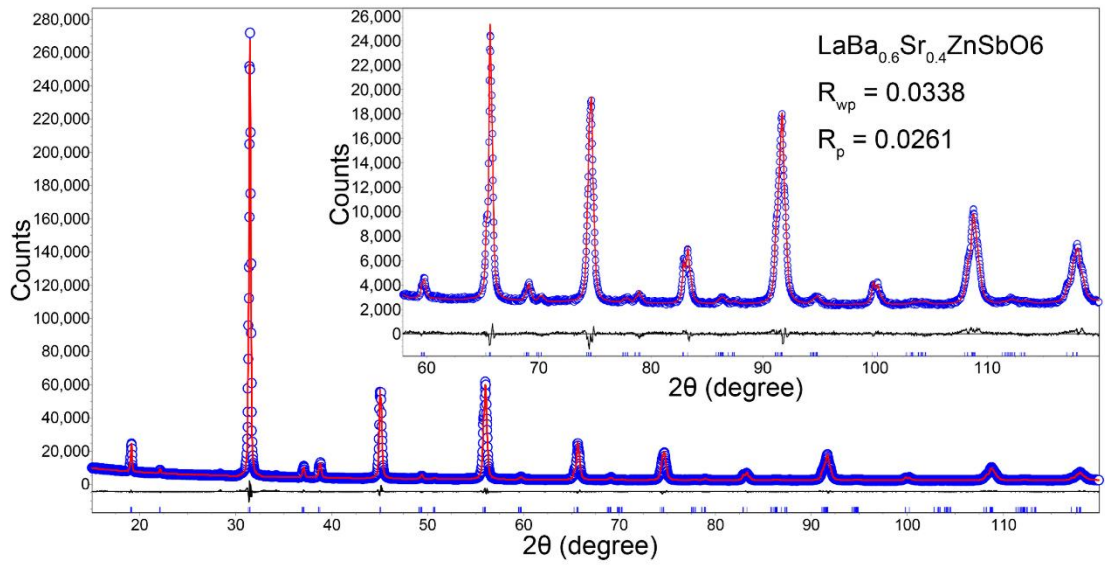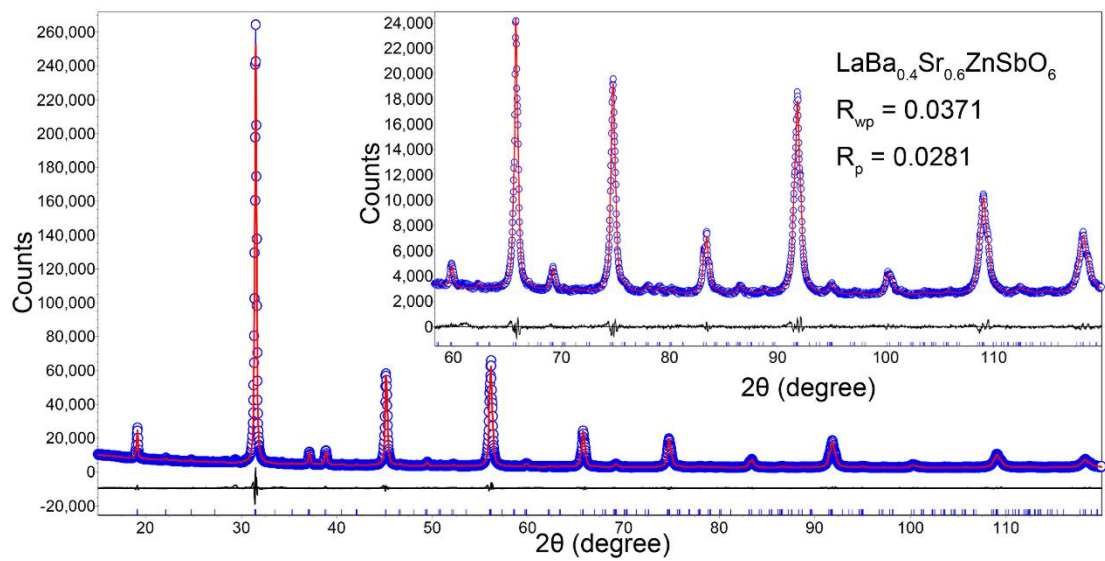

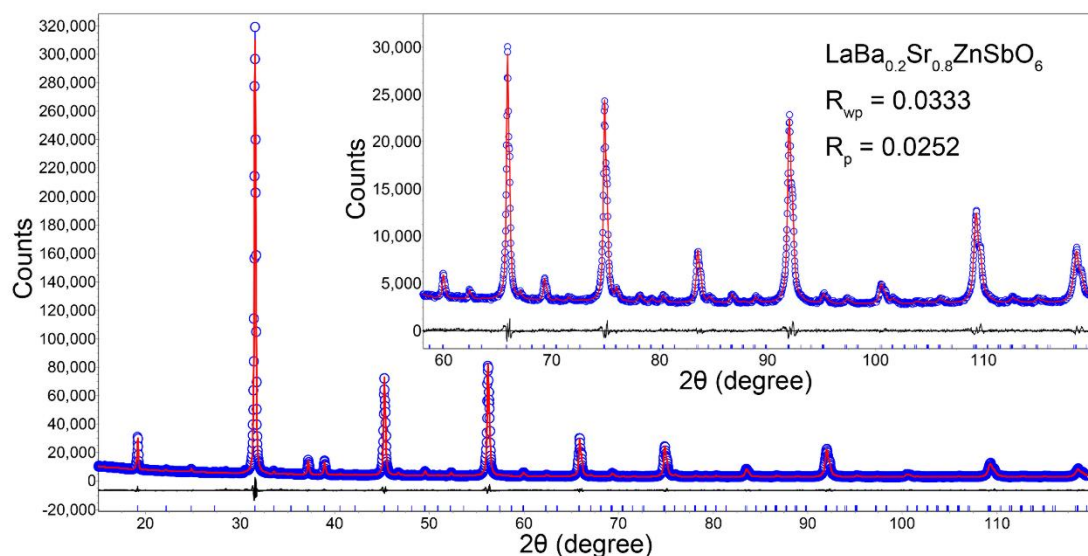

Fig. S3 Final convergence of Rietveld refinement for  $\text{LaBa}_{1-x}\text{Sr}_x\text{ZnSbO}_6$  ( $x = 0.2, 0.4, 0.6, 0.8$ ). The blue symbol  $\circ$  represents observed data and the red solid line is the calculated pattern; the blue marks below the diffraction patterns are the expected reflection positions, and the difference curve is also shown at the bottom. Enlargements of the high angle part are shown in the top-right corner.

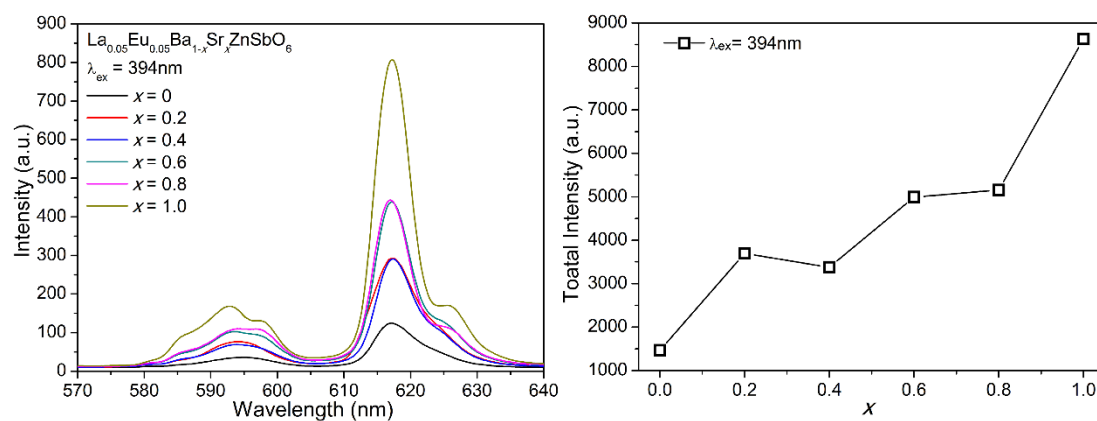

Fig. S4 (a) emission spectra of  $\text{La}_{0.95}\text{Eu}_{0.05}\text{Ba}_{1-x}\text{Sr}_x\text{ZnSbO}_6$  excited by 394 nm; (b) total emission intensities excited under 394 nm along with the content of  $\text{Sr}^{3+}$ .



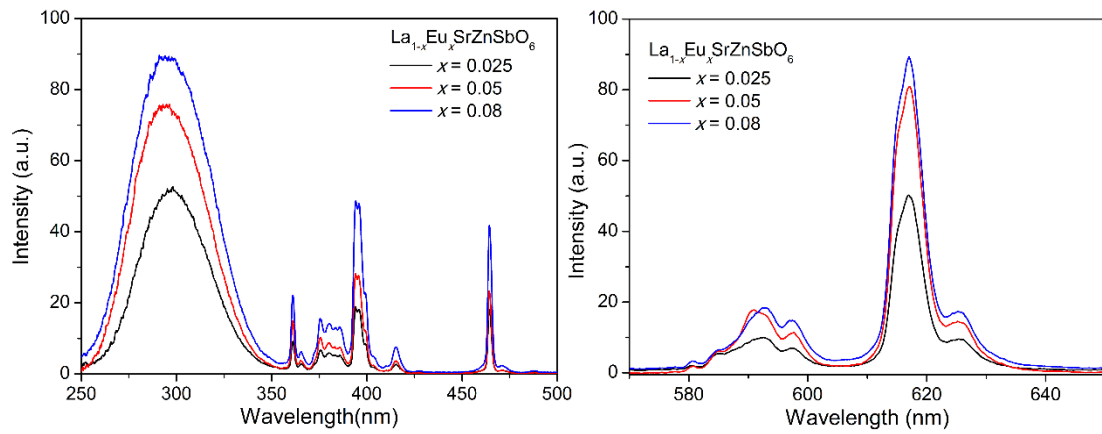

Fig. S5 Excitation (left) and emission (right) spectra for  $\text{La}_{1-x}\text{Eu}_x\text{SrZnSbO}_6$  ( $x = 0.025, 0.05, 0.08$ ).
